# Supplementary material for: Precipitation Controls on Soil Biogeochemical and Microbial Community Composition in Rainfed Agricultural Systems in Tropical Drylands
Source: MDPI journal article supplement (doi:10.3390/su132111848), 2021-10-27
Supplement: s1 [file s1]

**Table S1.** Analysis of variance (ANOVA) for soil organic carbon, total nitrogen and total phosphorus concentrations considering the main effects (crop and region) and their interaction (crop\*region).

Organic carbon

| Term        | Df | Sum Sq | Mean Sq | F     | p       |
|-------------|----|--------|---------|-------|---------|
| Crop        | 1  | 9.18   | 9.18    | 4.613 | 0.050   |
| Region      | 1  | 403.2  | 403.2   | 202.5 | < 0.001 |
| Crop*Region | 1  | 8.99   | 8.99    | 4.517 | 0.052   |
| Residuals   | 14 | 27.87  | 1.99    |       |         |

Total nitrogen

| Term        | Df | Sum Sq | Mean Sq | F     | p     |
|-------------|----|--------|---------|-------|-------|
| Crop        | 1  | 0.176  | 0.176   | 0.286 | 0.601 |
| Region      | 1  | 3.243  | 3.243   | 5.262 | 0.038 |
| Crop*Region | 1  | 1.291  | 1.291   | 2.095 | 0.169 |
| Residuals   | 14 | 8.627  | 0.616   |       |       |

Total phosphorus

| Term        | Df | Sum Sq | Mean Sq | F     | p     |
|-------------|----|--------|---------|-------|-------|
| Crop        | 1  | 1710   | 1710    | 0.575 | 0.461 |
| Region      | 1  | 1246   | 1246    | 0.419 | 0.546 |
| Crop*Region | 1  | 2780   | 2780    | 0.935 | 0.349 |
| Residuals   | 14 | 41618  | 2973    |       |       |

**Table S2.** Analysis of variance (ANOVA) for enzyme activities considering the main effects (crop and region) and their interaction (crop\*region).**β-1,4-glucosidase (BG)**

| <b>Term</b> | <b>Df</b> | <b>Sum Sq</b> | <b>Mean Sq</b> | <b>F</b> | <b>p</b> |
|-------------|-----------|---------------|----------------|----------|----------|
| Crop        | 1         | 0.0046        | 0.0046         | 0.271    | 0.611    |
| Region      | 1         | 0.0470        | 0.0470         | 2.755    | 0.119    |
| Crop*Region | 1         | 0.0289        | 0.0289         | 1.698    | 0.214    |
| Residuals   | 14        | 0.2389        | 0.0171         |          |          |

**Polyphenol oxidase (POX)**

| <b>Term</b> | <b>Df</b> | <b>Sum Sq</b> | <b>Mean Sq</b> | <b>F</b> | <b>p</b> |
|-------------|-----------|---------------|----------------|----------|----------|
| Crop        | 1         | 0.0003        | 0.0003         | 0.009    | 0.924    |
| Region      | 1         | 0.0112        | 0.0112         | 0.308    | 0.587    |
| Crop*Region | 1         | 0.1782        | 0.1782         | 4.885    | 0.044    |
| Residuals   | 14        | 0.5108        | 0.0365         |          |          |

**Leucine aminopeptidase (LAP)**

| <b>Term</b> | <b>Df</b> | <b>Sum Sq</b> | <b>Mean Sq</b> | <b>F</b> | <b>p</b> |
|-------------|-----------|---------------|----------------|----------|----------|
| Crop        | 1         | 0.0175        | 0.0175         | 0.369    | 0.553    |
| Region      | 1         | 0.0470        | 0.0470         | 0.992    | 0.336    |
| Crop*Region | 1         | 0.0022        | 0.0022         | 0.046    | 0.832    |
| Residuals   | 14        | 0.6635        | 0.0474         |          |          |

**β-1,4-N-acetylglucosaminidase (NAG)**

| <b>Term</b> | <b>Df</b> | <b>Sum Sq</b> | <b>Mean Sq</b> | <b>F</b> | <b>p</b> |
|-------------|-----------|---------------|----------------|----------|----------|
| Crop        | 1         | 0.0069        | 0.0069         | 0.267    | 0.613    |
| Region      | 1         | 0.0800        | 0.0800         | 3.118    | 0.099    |
| Crop*Region | 1         | 0.0148        | 0.0148         | 0.578    | 0.459    |
| Residuals   | 14        | 0.3592        | 0.0257         |          |          |

**Acid phosphatase (AP)**

| <b>Term</b> | <b>Df</b> | <b>Sum Sq</b> | <b>Mean Sq</b> | <b>F</b> | <b>p</b> |
|-------------|-----------|---------------|----------------|----------|----------|
| Crop        | 1         | 0.0020        | 0.0020         | 0.020    | 0.889    |
| Region      | 1         | 0.0925        | 0.0925         | 0.944    | 0.348    |
| Crop*Region | 1         | 0.0002        | 0.0002         | 0.001    | 0.968    |
| Residuals   | 14        | 1.3707        | 0.0979         |          |          |

**Table S3.** Analysis of variance (ANOVA) for enzyme stoichiometry activity ratios considering the main effects (crop and region) and their interaction (crop\*region).

(BG+POX) : (LAP+NAG)

| Term        | Df | Sum Sq | Mean Sq | F     | p     |
|-------------|----|--------|---------|-------|-------|
| Crop        | 1  | 0.103  | 0.103   | 0.172 | 0.685 |
| Region      | 1  | 0.376  | 0.376   | 0.627 | 0.442 |
| Crop*Region | 1  | 3.646  | 3.646   | 6.083 | 0.027 |
| Residuals   | 14 | 8.391  | 0.599   |       |       |

(BG+POX) : AP

| Term        | Df | Sum Sq | Mean Sq | F     | p     |
|-------------|----|--------|---------|-------|-------|
| Crop        | 1  | 0.017  | 0.017   | 0.020 | 0.889 |
| Region      | 1  | 0.098  | 0.098   | 0.116 | 0.738 |
| Crop*Region | 1  | 1.168  | 1.168   | 1.382 | 0.259 |
| Residuals   | 14 | 11.83  | 0.845   |       |       |

(LAP+NAG) : AP

| Term        | Df | Sum Sq | Mean Sq | F     | p     |
|-------------|----|--------|---------|-------|-------|
| Crop        | 1  | 0.077  | 0.077   | 0.179 | 0.679 |
| Region      | 1  | 0.100  | 0.100   | 0.233 | 0.637 |
| Crop*Region | 1  | 0.106  | 0.106   | 0.246 | 0.627 |
| Residuals   | 14 | 6.001  | 0.429   |       |       |

**Table S4.** Analysis of variance (ANOVA) of soil microbial diversity considering the main effects (crop and region) and their interaction (crop\*region).Shannon Index  $H$  (Bacteria)

| Term        | Df | Sum Sq | Mean Sq | $F$   | $p$     |
|-------------|----|--------|---------|-------|---------|
| Crop        | 1  | 0.1452 | 0.1452  | 9.162 | 0.009   |
| Region      | 1  | 0.6087 | 0.6087  | 38.41 | < 0.001 |
| Crop*Region | 1  | 0.0611 | 0.0611  | 3.855 | 0.070   |
| Residuals   | 14 | 0.2219 | 0.0158  |       |         |

Shannon Index  $H$  (Fungi)

| Term        | Df | Sum Sq | Mean Sq | $F$   | $p$   |
|-------------|----|--------|---------|-------|-------|
| Crop        | 1  | 0.0253 | 0.0253  | 0.106 | 0.750 |
| Region      | 1  | 0.3042 | 0.3042  | 1.273 | 0.278 |
| Crop*Region | 1  | 0.1664 | 0.1664  | 0.696 | 0.418 |
| Residuals   | 14 | 3.3459 | 0.2390  |       |       |

Simpson Index  $D$  (Bacteria)

| Term        | Df | Sum Sq   | Mean Sq  | $F$   | $p$   |
|-------------|----|----------|----------|-------|-------|
| Crop        | 1  | 1.77e-05 | 1.77e-05 | 6.472 | 0.023 |
| Region      | 1  | 3.96e-05 | 3.96e-05 | 14.46 | 0.002 |
| Crop*Region | 1  | 1.26e-06 | 1.26e-06 | 0.460 | 0.509 |
| Residuals   | 14 | 3.84e-05 | 2.74e-06 |       |       |

Simpson Index  $D$  (Fungi)

| Term        | Df | Sum Sq  | Mean Sq | $F$   | $p$   |
|-------------|----|---------|---------|-------|-------|
| Crop        | 1  | 0.0004  | 0.0004  | 0.247 | 0.627 |
| Region      | 1  | 0.00001 | 0.00001 | 0.006 | 0.941 |
| Crop*Region | 1  | 0.0009  | 0.0009  | 0.522 | 0.482 |
| Residuals   | 14 | 0.0243  | 0.0017  |       |       |

**Table S5.** Analysis of deviance (ANODEV) of soil bacterial abundance considering the main effects (crop and region) and their interaction (crop\*region).*Proteobacteria*

| Term        | Df | Deviance | $\chi^2$ | <i>p</i> |
|-------------|----|----------|----------|----------|
| Crop        | 1  | 0.0029   | 0.001    | 0.970    |
| Region      | 1  | 389.64   | 194.8    | < 0.001  |
| Crop*Region | 1  | 3.3416   | 1.671    | 0.196    |

*Actinobacteria*

| Term        | Df | Deviance | $\chi^2$ | <i>p</i> |
|-------------|----|----------|----------|----------|
| Crop        | 1  | 0.1289   | 0.064    | 0.800    |
| Region      | 1  | 135.60   | 67.80    | < 0.001  |
| Crop*Region | 1  | 6.3086   | 3.154    | 0.076    |

*Acidobacteria*

| Term        | Df | Deviance | $\chi^2$ | <i>p</i> |
|-------------|----|----------|----------|----------|
| Crop        | 1  | 0.1527   | 0.076    | 0.782    |
| Region      | 1  | 737.02   | 368.5    | < 0.001  |
| Crop*Region | 1  | 51.142   | 25.57    | < 0.001  |

*Gemmatimonadetes*

| Term        | Df | Deviance | $\chi^2$ | <i>p</i> |
|-------------|----|----------|----------|----------|
| Crop        | 1  | 12.111   | 6.056    | 0.014    |
| Region      | 1  | 317.56   | 158.8    | < 0.001  |
| Crop*Region | 1  | 12.934   | 6.467    | 0.011    |

*Bacteroidetes*

| Term        | Df | Deviance | $\chi^2$ | <i>p</i> |
|-------------|----|----------|----------|----------|
| Crop        | 1  | 1.4072   | 0.704    | 0.402    |
| Region      | 1  | 55.430   | 27.72    | < 0.001  |
| Crop*Region | 1  | 0.0003   | 2.0e-04  | 0.989    |

*Nitrospirae*

| Term        | Df | Deviance | $\chi^2$ | <i>p</i> |
|-------------|----|----------|----------|----------|
| Crop        | 1  | 0.2098   | 0.105    | 0.746    |
| Region      | 1  | 295.16   | 147.6    | < 0.001  |
| Crop*Region | 1  | 0.2195   | 0.110    | 0.740    |

*Firmicutes*

| Term        | Df | Deviance | $\chi^2$ | <i>p</i> |
|-------------|----|----------|----------|----------|
| Crop        | 1  | 2.382    | 1.191    | 0.275    |
| Region      | 1  | 288.48   | 144.2    | < 0.001  |
| Crop*Region | 1  | 5.80e-05 | 0        | 0.996    |

*Cyanobacteria*

| Term        | Df | Deviance | $\chi^2$ | <i>p</i> |
|-------------|----|----------|----------|----------|
| Crop        | 1  | 18.777   | 9.388    | 0.002    |
| Region      | 1  | 146.16   | 73.08    | < 0.001  |
| Crop*Region | 1  | 14.675   | 7.338    | 0.007    |

*Armatimonadetes*

| Term        | Df | Deviance | $\chi^2$ | <i>p</i> |
|-------------|----|----------|----------|----------|
| Crop        | 1  | 5.7978   | 2.899    | 0.089    |
| Region      | 1  | 61.174   | 30.59    | < 0.001  |
| Crop*Region | 1  | 12.348   | 6.174    | 0.013    |

**Table S6.** Analysis of deviance (ANODEV) of soil fungi abundance considering the main effects (crop and region) and their interaction (crop\*region).*Ascomycota*

| Term        | Df | Deviance | $\chi^2$ | <i>p</i> |
|-------------|----|----------|----------|----------|
| Crop        | 1  | 58.144   | 29.07    | < 0.001  |
| Region      | 1  | 0.0019   | 0.001    | 0.975    |
| Crop*Region | 1  | 0.3237   | 0.162    | 0.688    |

*Basidiomycota*

| Term        | Df | Deviance | $\chi^2$ | <i>p</i> |
|-------------|----|----------|----------|----------|
| Crop        | 1  | 11.864   | 5.932    | 0.015    |
| Region      | 1  | 143.40   | 71.70    | < 0.001  |
| Crop*Region | 1  | 69.386   | 34.69    | < 0.001  |

*Mortierellomycota*

| Term        | Df | Deviance | $\chi^2$ | <i>p</i> |
|-------------|----|----------|----------|----------|
| Crop        | 1  | 9.8134   | 4.907    | 0.027    |
| Region      | 1  | 63.946   | 31.97    | < 0.001  |
| Crop*Region | 1  | 18.939   | 9.470    | 0.002    |

**Table S7.** Pearson correlations among soil carbon, nitrogen and phosphorus concentrations, soil enzyme activity and, bacterial and fungal abundances. The upper diagonal corresponds to the semiarid region and the lower diagonal refers to the arid region.

|                                |               |       | OC    | TN    | TP            | Bg             | Pox           | Lap            | Nag           | Cyano | Firmi         | Gemma          |
|--------------------------------|---------------|-------|-------|-------|---------------|----------------|---------------|----------------|---------------|-------|---------------|----------------|
| Organic C (OC)                 |               |       | 0.61  | 0.57  | 0.52          | <b>0.77*</b>   | <b>-0.69*</b> | 0.51           | <b>0.81**</b> |       |               | -0.21          |
| Total N (TN)                   | 0.37          |       |       | 0.31  | 0.09          | 0.19           | -0.14         | 0.06           | 0.43          |       |               | 0.43           |
| Total P (TP)                   | -0.12         | -0.38 |       |       | <b>0.67*</b>  | <b>0.70*</b>   | -0.59         | 0.27           | 0.46          |       |               | -0.17          |
| $\beta$ -1,4-glucosidase (Bg)  | 0.06          | 0.01  | 0.01  |       | <b>0.72*</b>  | <b>-0.87**</b> | 0.45          | <b>0.67*</b>   | 0.17          |       | -0.24         | -0.21          |
| Polyphenol oxidase (Pox)       | -0.58         | 0.21  | -0.4  | -0.4  |               | <b>-0.87**</b> | <b>0.70*</b>  | <b>0.72*</b>   | 0.17          |       | -0.31         | -0.55          |
| Leucine aminopeptidase (Lap)   | 0.15          | 0.24  | 0.35  | -0.02 | -0.05         |                | <b>-0.67*</b> | <b>-0.82**</b> | 0.09          |       | 0.12          | 0.32           |
| N-acetyl glucosaminidase (Nag) | 0.14          | -0.17 | 0.37  | 0.65  | -0.42         | -0.17          | <b>0.77*</b>  | -0.44          | 0.45          | -0.17 | -0.06         | 0.14           |
| Acid phosphatase (Ap)          | -0.24         | -0.2  | 0.3   | 0.36  | -0.11         | -0.42          | <b>0.68*</b>  |                | -0.28         |       | -0.05         | 0.08           |
| Acidobacteria (Acido)          | -0.09         | -0.08 | 0.4   | -0.38 | 0.24          | <b>0.74*</b>   | -0.13         | -0.08          |               |       | -0.5          | -0.41          |
| Actinobacteria (Actin)         | <b>-0.66</b>  | -0.23 | 0.13  | -0.18 | 0.42          | -0.28          | -0.37         | 0.03           | -0.23         |       | 0.48          | 0.34           |
| Armatimonadetes (Armat)        | -0.58         | -0.22 | 0.19  | 0.45  | -0.06         | -0.46          | 0.21          | 0.43           | -0.59         |       | -0.51         | -0.39          |
| Ascomycota (Ascom)             | 0.44          | -0.29 | -0.11 | -0.21 | -0.3          | -0.52          | 0.32          | 0.12           | -0.22         |       | -0.18         | 0.51           |
| Bacteroidetes (Bacter)         | <b>0.93**</b> | 0.63  | -0.2  | 0.19  | -0.42         | 0.24           | 0.15          | -0.27          | -0.14         |       | <b>0.86**</b> | 0.06           |
| Basidiomycota (Basid)          | -0.65         | -0.05 | -0.28 | 0.22  | 0.38          | -0.44          | -0.25         | 0.19           | -0.48         |       | 0.28          | 0.24           |
| Cyanobacteria (Cyano)          | -0.24         | -0.01 | 0.1   | 0.44  | -0.29         | -0.32          | 0.03          | 0.11           | <b>-0.72*</b> |       |               | 0.05           |
| Firmicutes (Firmi)             |               | 0.43  | 0.39  | -0.65 | -0.07         | 0.26           | -0.34         | 0.16           | 0.11          |       |               | -0.56          |
| Gemmatimonadetes (Gemma)       | 0.06          | -0.24 | 0.18  | 0.05  | -0.03         | 0.63           | 0.12          | -0.01          | <b>0.80**</b> |       | <b>-0.71*</b> | 0.05           |
| Mortierellomycota (Morti)      | 0.66          | 0.59  | -0.51 | 0.07  | 0.08          | -0.11          | 0.25          | -0.02          | -0.11         |       | -0.47         | <b>0.91***</b> |
| Nitrospirae (Nitro)            |               | 0.05  | -0.33 | 0.13  | -0.35         | 0.27           | 0.05          | 0.24           | 0.14          |       |               | <b>-0.85**</b> |
| Proteobacteria (Prote)         | 0.51          | -0.22 | -0.1  | 0.45  | <b>-0.76*</b> | -0.24          | 0.44          | 0.05           | -0.44         |       | 0.12          | 0.14           |

Note. Significant correlation in bold; significance: \*,  $p < 0.05$ ; \*\*,  $p < 0.01$ ; \*\*\*,  $p < 0.001$ .
